# Supplementary material for: Investigation of the 5q33.3 longevity locus and age-related phenotypes
Source: publisher site journal article supplement (doi:10.18632/aging.101156), 2017-01-13
Supplement: Supplementary file 1 [file aging-v9i1-101156-supplementary-material-SD1.pdf]

**Supplementary Table 1. Descriptives of self-reported diseases and age-related phenotypes investigated in the four study cohorts.**

|                        | Middle-aged <sup>1</sup> |                     | Elderly <sup>2</sup> |                     | LLI-1 <sup>3</sup> |                     | LLI-2 <sup>4</sup> |                     |
|------------------------|--------------------------|---------------------|----------------------|---------------------|--------------------|---------------------|--------------------|---------------------|
| Self-reported Disease  | N                        | No. individuals (%) | N                    | No. individuals (%) | N                  | No. individuals (%) | N                  | No. individuals (%) |
| Cancer                 | 700                      |                     | 677                  |                     | 1,579              |                     | 1,265              |                     |
| No                     |                          | 685 (97.9%)         |                      | 593 (87.6%)         |                    | 1,462 (92.6%)       |                    | 1,131 (89.4%)       |
| Has now or has had     |                          | 15 (2.1%)           |                      | 84 (12.4%)          |                    | 117 (7.4%)          |                    | 134 (10.6%)         |
| Angina Pectoris        | 700                      |                     | 676                  |                     | 1,579              |                     | 1,264              |                     |
| No                     |                          | 694 (99.1%)         |                      | 634 (93.8%)         |                    | 1,410 (89.3%)       |                    | 1,166 (92.2%)       |
| Has now or has had     |                          | 6 (0.9%)            |                      | 42 (6.2%)           |                    | 169 (10.7%)         |                    | 98 (7.8%)           |
| Heart Attack           | 700                      |                     | 677                  |                     | 1,581              |                     | 1,266              |                     |
| No                     |                          | 697 (99.6%)         |                      | 635 (93.8%)         |                    | 1,470 (93.0%)       |                    | 1,149 (90.8%)       |
| Has now or has had     |                          | 3 (0.4%)            |                      | 42 (6.2%)           |                    | 111 (7.0%)          |                    | 117 (9.2%)          |
| Heart Failure          | 700                      |                     | 676                  |                     | 1,577              |                     | 1,263              |                     |
| No                     |                          | 698 (99.7%)         |                      | 633 (93.6%)         |                    | 1,390 (88.1%)       |                    | 1,210 (95.8%)       |
| Has now or has had     |                          | 2 (0.3%)            |                      | 43 (6.4%)           |                    | 187 (11.9%)         |                    | 53 (4.2%)           |
| Hypertension           | 700                      |                     | 676                  |                     | 1,567              |                     | 1,261              |                     |
| No                     |                          | 612 (87.4%)         |                      | 493 (72.9%)         |                    | 1,246 (79.5%)       |                    | 836 (66.3%)         |
| Has now or has had     |                          | 88 (12.6%)          |                      | 183 (27.1%)         |                    | 321 (20.5%)         |                    | 425 (33.7%)         |
| Irregular Heart Rhythm | 698                      |                     | 677                  |                     | 1,580              |                     | 1,264              |                     |
| No                     |                          | 654 (93.7%)         |                      | 591 (87.3%)         |                    | 1,265 (80.1%)       |                    | 975 (77.1%)         |
| Has now or has had     |                          | 44 (6.3%)           |                      | 86 (12.7%)          |                    | 315 (19.9%)         |                    | 289 (22.9%)         |
| Other Heart Problems   | 700                      |                     | 675                  |                     | 1,579              |                     | 1,259              |                     |
| No                     |                          | 693 (99.0%)         |                      | 636 (94.2%)         |                    | 1,452 (92.0%)       |                    | 1,131 (89.8%)       |
| Has now or has had     |                          | 7 (1.0%)            |                      | 39 (5.8%)           |                    | 127 (8.0%)          |                    | 128 (10.2%)         |
| Stroke                 | 700                      |                     | 677                  |                     | 1,580              |                     | 1,270              |                     |
| No                     |                          | 692 (98.9%)         |                      | 639 (94.4%)         |                    | 1,425 (90.2%)       |                    | 1,118 (88.0%)       |
| Has now or has had     |                          | 8 (1.1%)            |                      | 38 (5.6%)           |                    | 155 (9.8%)          |                    | 152 (12.0%)         |
| Age-related Phenotype  | N                        | No. individuals (%) | N                    | No. individuals (%) | N                  | No. individuals (%) | N                  | No. individuals (%) |
| ADL Disability         | NA                       |                     | NA                   |                     | 1,586              |                     | 1,266              |                     |
| Not disabled           |                          | NA                  |                      | NA                  |                    | 815 (51.4%)         |                    | 613 (48.4%)         |
| Moderately disabled    |                          | NA                  |                      | NA                  |                    | 586 (36.9%)         |                    | 491 (38.8%)         |
| Disabled               |                          | NA                  |                      | NA                  |                    | 185 (11.7%)         |                    | 162 (12.8%)         |
| ADL Strength           | NA                       |                     | 676                  |                     | 1,571              |                     | 1,254              |                     |
| < 2                    |                          | NA                  |                      | 77 (11.4%)          |                    | 865 (55.1%)         |                    | 588 (46.9%)         |
| 2-<3                   |                          | NA                  |                      | 130 (19.2%)         |                    | 583 (37.1%)         |                    | 419 (33.4%)         |
| ≥ 3                    |                          | NA                  |                      | 469 (69.4%)         |                    | 123 (7.8%)          |                    | 247 (19.7%)         |

|                                                                                                                                           |          |                                                                   |          |                                                                     |          |                                                                      |          |                                                                     |
|-------------------------------------------------------------------------------------------------------------------------------------------|----------|-------------------------------------------------------------------|----------|---------------------------------------------------------------------|----------|----------------------------------------------------------------------|----------|---------------------------------------------------------------------|
| Chair Stand<br>Cannot<br>Can, with use of arms<br>Can, without use of arms                                                                | NA       | NA<br>NA<br>NA                                                    | NA       | NA<br>NA<br>NA                                                      | 1,488    | 103 (6.9%)<br>572 (38.4%)<br>813 (54.7%)                             | 1,250    | 125 (10.0%)<br>558 (44.6%)<br>567 (45.4%)                           |
| Chair Stand, Timed*<br>1 <sup>st</sup> quartile<br>2 <sup>nd</sup> quartile<br>3 <sup>rd</sup> quartile<br>4 <sup>th</sup> quartile       | 682      | 171 (25.1%)<br>170 (24.9%)<br>171 (25.1%)<br>170 (24.9%)          | 421      | 108 (25.7%)<br>125 (29.7%)<br>84 (19.9%)<br>104 (24.7%)             | NA       | NA<br>NA<br>NA<br>NA                                                 | NA       | NA<br>NA<br>NA<br>NA                                                |
| Depression Symptomatology<br>1 <sup>st</sup> quartile<br>2 <sup>nd</sup> quartile<br>3 <sup>rd</sup> quartile<br>4 <sup>th</sup> quartile | 700      | 253 (36.2%)<br>133 (19.0%)<br>157 (22.4%)<br>157 (22.4%)          | 656      | 206 (31.4%)<br>139 (21.2%)<br>175 (26.7%)<br>136 (20.7%)            | 1,492    | 378 (25.4%)<br>436 (29.2%)<br>342 (22.9%)<br>336 (22.5%)             | 1,253    | 324 (25.9%)<br>314 (25.0%)<br>343 (27.4%)<br>272 (21.7%)            |
| Gait Speed<br>Cannot walk<br>Speed ≤ 0.375 m/s<br>Speed > 0.375 m/s                                                                       | NA       | NA<br>NA<br>NA                                                    | NA       | NA<br>NA<br>NA                                                      | 1,314    | 151 (11.5%)<br>303 (23.1%)<br>860 (65.4%)                            | 1,041    | 186 (17.9%)<br>196 (18.8%)<br>659 (63.3%)                           |
| MMSE<br>Severe impairment (0-17)<br>Mild impairment (18-22)<br>Normal (23-27)<br>Maximum (28-30)                                          | NA       | NA<br>NA<br>NA<br>NA                                              | 657      | 26 (4.0%)<br>68 (10.4%)<br>290 (44.1%)<br>273 (41.5%)               | 1,522    | 307 (20.2%)<br>389 (25.5%)<br>618 (40.6%)<br>208 (13.7%)             | 1,246    | 218 (17.5%)<br>281 (22.6%)<br>469 (37.6%)<br>278 (22.3%)            |
| Self-rated Health<br>Very poor<br>Poor<br>Acceptable<br>Good<br>Excellent                                                                 | 700      | 4 (0.6%)<br>27 (3.9%)<br>84 (12.0%)<br>271 (38.7%)<br>314 (44.8%) | 661      | 11 (1.7%)<br>36 (5.4%)<br>148 (22.4%)<br>245 (37.1%)<br>221 (33.4%) | 1,526    | 26 (1.7%)<br>128 (8.4%)<br>499 (32.7%)<br>615 (40.3%)<br>258 (16.9%) | 1,265    | 21 (1.7%)<br>53 (4.2%)<br>314 (24.8%)<br>525 (41.5%)<br>352 (27.8%) |
| <b>Age-related Phenotype</b>                                                                                                              | <b>N</b> | <b>Mean (SE)</b>                                                  | <b>N</b> | <b>Mean (SE)</b>                                                    | <b>□</b> | <b>Mean (SE)</b>                                                     | <b>N</b> | <b>Mean (SE)</b>                                                    |
| Cognitive Composite Score                                                                                                                 | 700      | 5.61 (0.12)                                                       | 659      | 0.98 (0.13)                                                         | 1,518    | 0.21 (0.09)                                                          | 1,244    | 0.47 (0.10)                                                         |
| Grip Strength*                                                                                                                            | 693      | 37.80 (0.47)                                                      | 484      | 24.31 (0.39)                                                        | 1,424    | 16.28 (0.17)                                                         | 1,091    | 15.93 (0.20)                                                        |

<sup>1</sup> Middle-aged refers to individuals from the Study of Middle-Aged Danish Twins (MADT). <sup>2</sup> Elderly refers to individuals from the Longitudinal Study of Aging Danish Twins (LSADT). <sup>3</sup>LLI-1: Long-lived individuals 1. <sup>4</sup>LLI-2: Long-lived individuals 2. \*In the elderly individuals these phenotypes were collected as part of the 1999 assessment of LSADT instead of the 1997 assessment. NA: Phenotype not available.
